# Supplementary material for: Automatic identification and annotation of MYB gene family members in plants
Source: PubMed Central journal article supplement (PMC8933966; doi:10.1186/s12864-022-08452-5), 2022-03-19

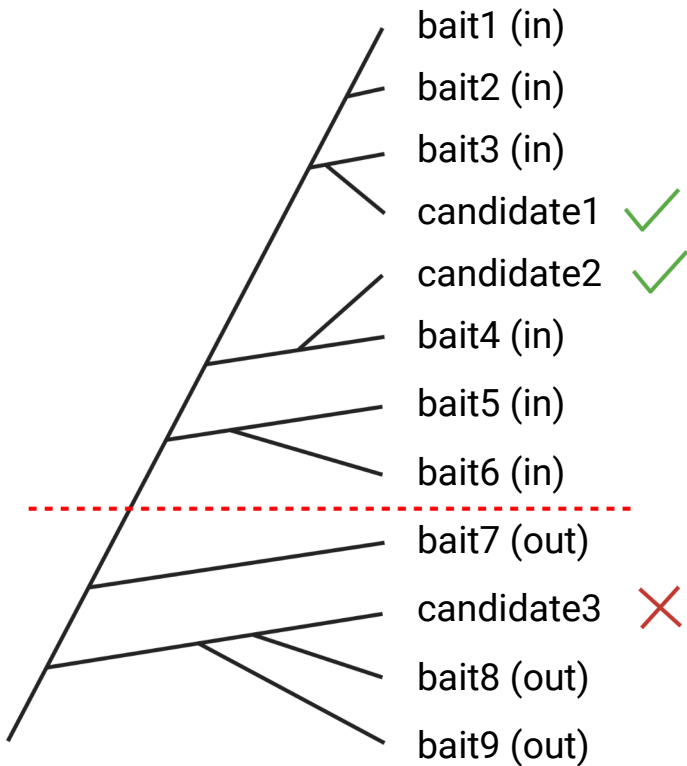

Supplement: 12864_2022_8452_MOESM1_ESM.pdf [file 12864_2022_8452_MOESM1_ESM.pdf]
